# Supplementary material for: Protein kinase A activation alleviates cataract formation via increased gap junction intercellular communication
Source: PubMed Central journal article supplement (PMC9958365; doi:10.1016/j.isci.2023.106114), 2023-02-02

iScience, Volume 26

## **Supplemental information**

### **Protein kinase A activation alleviates cataract formation via increased gap junction intercellular communication**

**Yu Du, Yuxin Tong, Yumeng Quan, Guangyan Wang, Hongyun Cheng, Sumin Gu, and Jean X. Jiang**

**Supplemental figure legends:**

**Figure S1. H<sub>2</sub>O<sub>2</sub>-induced cataract formation in response to different concentrations of PKA activator in WT mice, related to Figure 3 and Figure 4.** The lens of WT mice were kept transparent in culture media for 24 hrs with 5% CO<sub>2</sub> at 37°C before being treated with 0.5 mM H<sub>2</sub>O<sub>2</sub> for 4 hrs, followed by treatment with or without different concentrations of forskolin (**A**) or 8-Br-cAMP (**B**). The opacity intensity was quantified by NIH Image J software. The data are presented as the mean ± SEM. (n≥3). \*, P < 0.05; \*\*, P < 0.01; \*\*\*, P < 0.001 \*\*\*\*, P < 0.0001 (Two-way ANOVA).

**Figure S2. Dye transfer with different concentrations of forskolin, related to Figure 6.** CEF cells were infected with high-titer RCAS(A) retroviral vehicle (V) or recombinant RCAS(A) retroviruses containing Cx46 or co-infected with RCAS(A) containing Cx46 and Cx50, and cells were grown to confluence to maximize cell-cell contact. (**A**) Cells were treated with different concentrations of forskolin for 2 hrs before scrape loading dye transfer assay using LY (green) as a probe for gap junction coupling and RD (red) for detecting originally dye-loaded cells. Scale bar: 50 μm. (**B**) The extent of dye transfer was measured as the ratio of LY-stained cells to that of RD-labeled cells. The data are presented as the mean ± SEM. (n=3). \*\*\*\*, P < 0.0001 (Two-way ANOVA).

**Figure S3. Antioxidant protein expression in WT, Cx46KO, Cx50KO, and dKO mouse lens, related to Figure 7.** The protein extracts of isolated lenses from WT, Cx46KO, Cx50KO, and dKO mice were immunoblotted with anti-SOD1 (**A**), catalase (**B**), or β-actin (**A and B**) antibodies. The intensity of the bands was quantified using an Image Studio Lite Ver 5.2

software, and the ratio of SOD1 to  $\beta$ -actin (**A, lower panel**) and catalase to  $\beta$ -actin (**B, lower panel**) was presented. The data are presented as the mean  $\pm$ SEM. (n = 4). \*, P < 0.05; \*\*, P < 0.01; \*\*\*, P < 0.001; \*\*\*\*, P < 0.0001 (One-way ANOVA).

**Figure S4. Anti-oxidative protein in different regions of lenses, related to Figure 7.** (A) The lenses from WT, Cx46KO, Cx50KO, and dKO mice were treated with 300  $\mu$ M H<sub>2</sub>O<sub>2</sub> or 10 J/cm<sup>2</sup> UVB, and cryo-lens sections were immunostained with anti-SOD1 (green, upper panel) or anti-catalase (red, lower panel) antibody. High resolution fluorescence images of anterior (AT), equator (EQ), posterior (PT), and nuclear (NC) regions of lenses were captured. Scale bar = 20  $\mu$ m. The lens regions are indicated by dotted frames on the schematic diagram. (B) The intensity of the SOD1 or catalase was quantified by NIH Image J software. The data are presented as the mean  $\pm$ SEM. (n = 3). \*, P < 0.05; \*\*, P < 0.01; \*\*\*, P < 0.001; \*\*\*\*, P < 0.0001 (One-way ANOVA).

**Figure S5. Forskolin protects lens and reduces ROS against H<sub>2</sub>O<sub>2</sub> in a time-dependent manner, related to Figure 8.** (A) The lens of WT mice was kept transparent in culture media for 24 h at 37°C before being treated with 0.5 mM H<sub>2</sub>O<sub>2</sub> for 4 hrs, followed by treatment with 50  $\mu$ M forskolin or vehicle (DMSO). Images were taken at the identical magnification 5, 6, 8, 12, or 24 hrs after H<sub>2</sub>O<sub>2</sub> treatment using a dissecting microscope to count the increase in lens opacity. Lens were then incubated with 10  $\mu$ M carboxy H<sub>2</sub>DCFDA for 30 min at 37°C. At least three microphotographs of fluorescence fields were captured by a fluorescence microscope (Keyence BZ-X710) with a FITC filter. Scale bar: 100  $\mu$ m. The mean fluorescence intensity was quantified by using NIH Image J. (B) Intracellular ROS level and (C) the lens opacity was quantified by

NIH Image J software. The data are presented as the mean  $\pm$  SEM. (n=3). \* $P < 0.05$ , \*\* $P < 0.01$ , \*\*\* $P < 0.001$ , \*\*\*\* $P < 0.0001$  (Two-way ANOVA).

Fig. S1

**A**

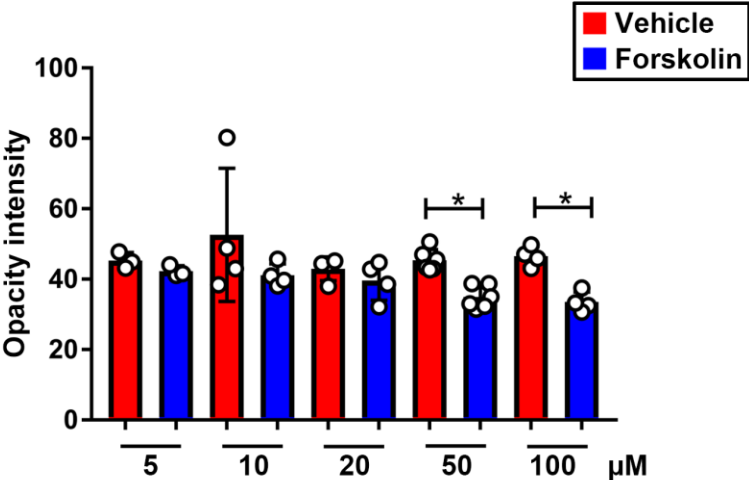

**B**

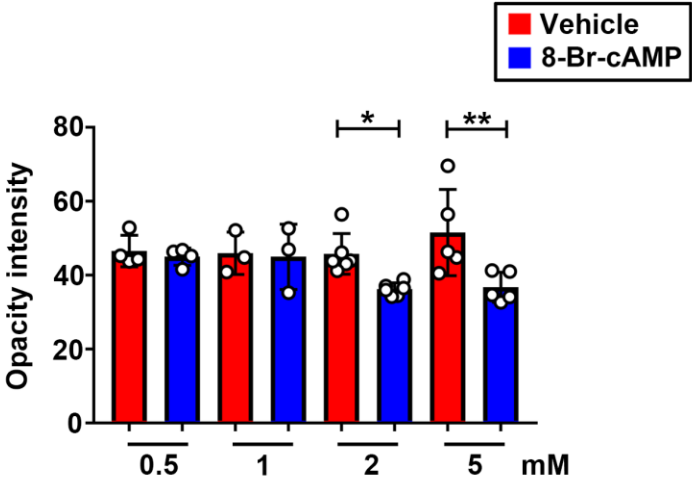

Fig. S2

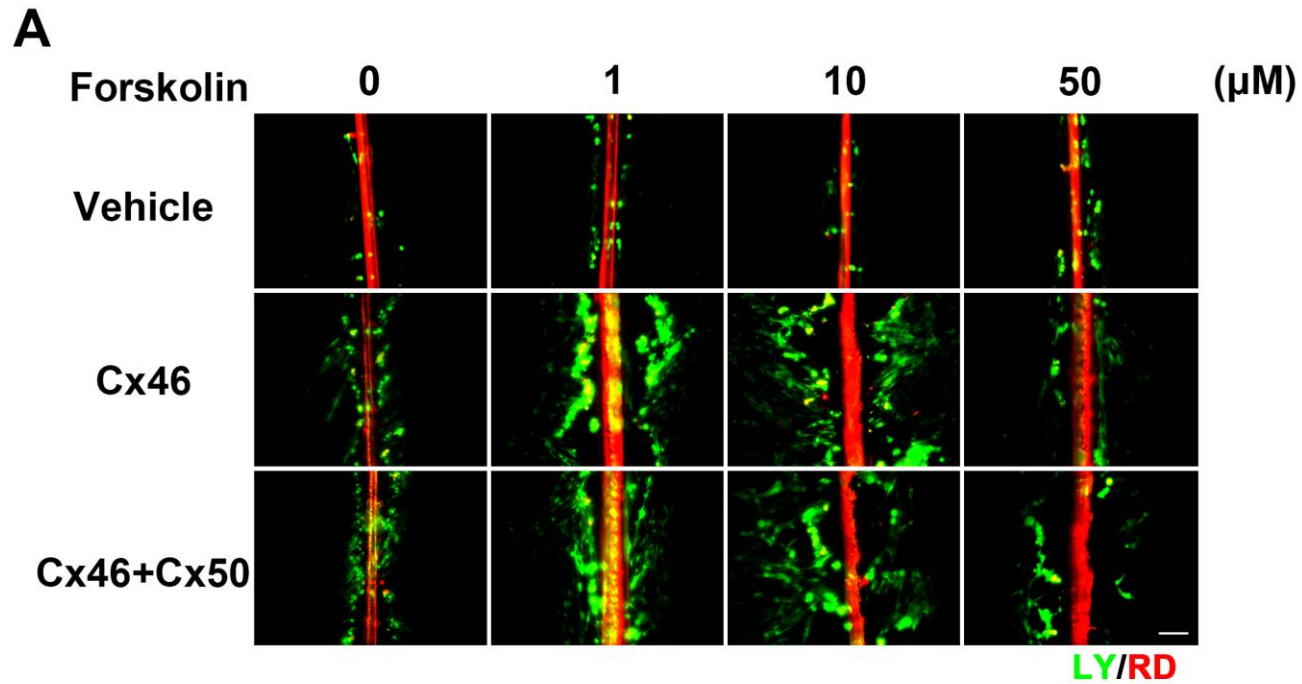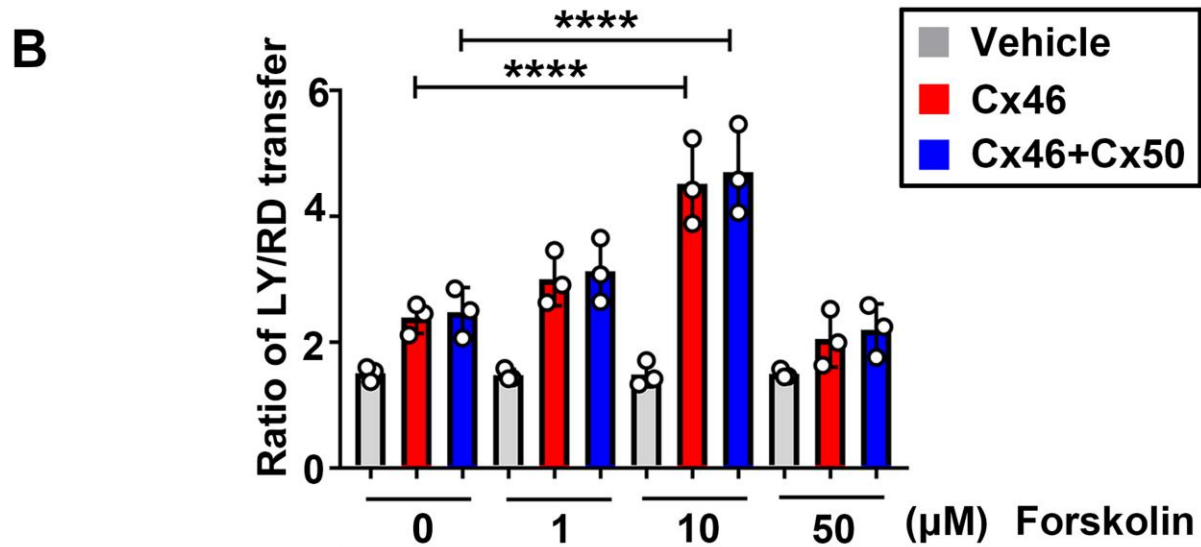

Fig. S3

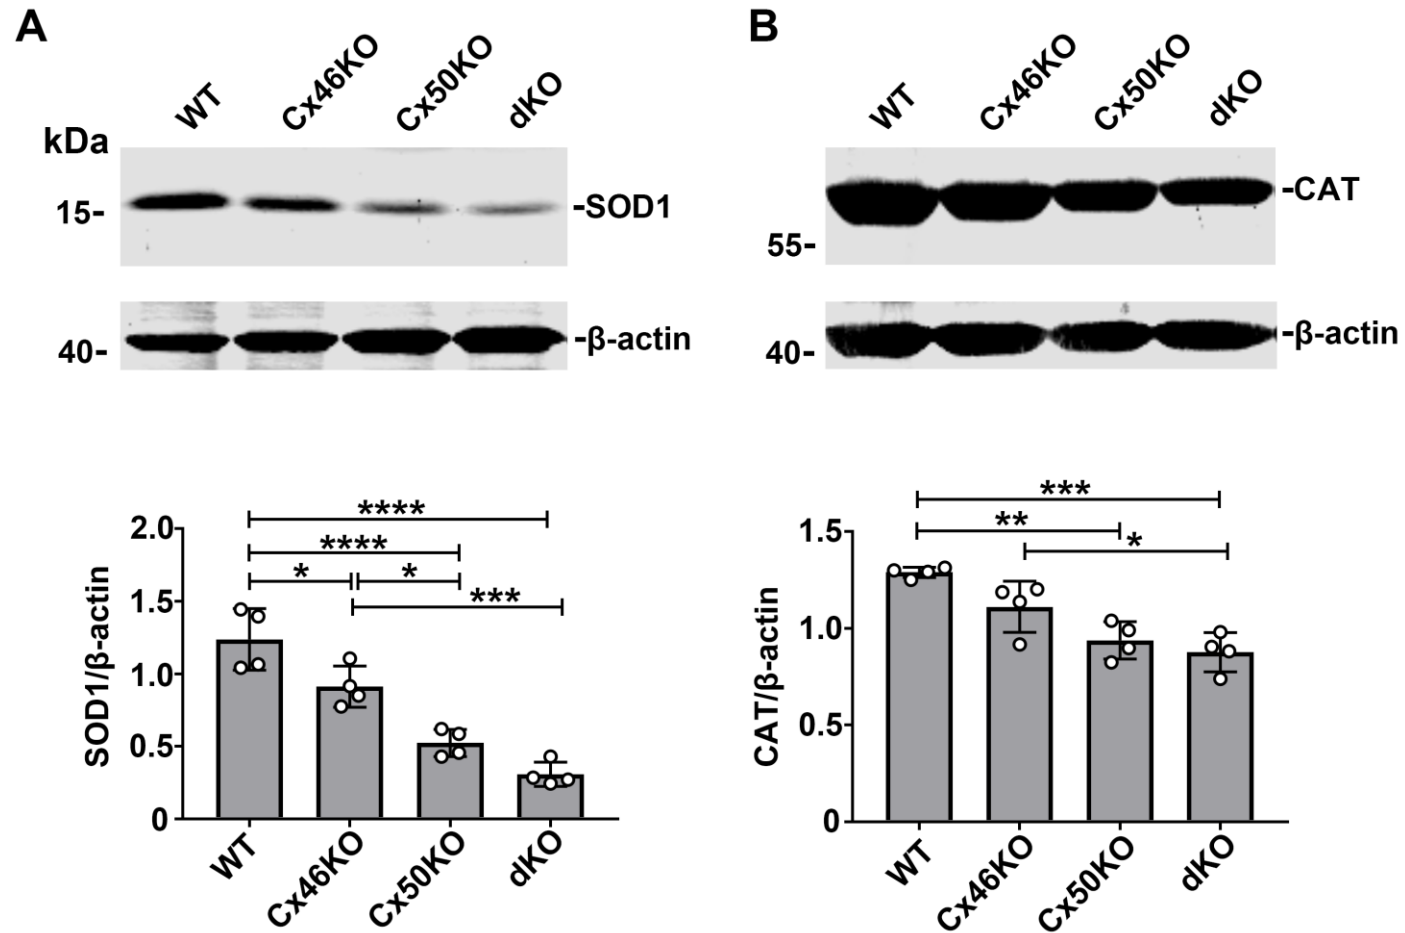

Fig. S4

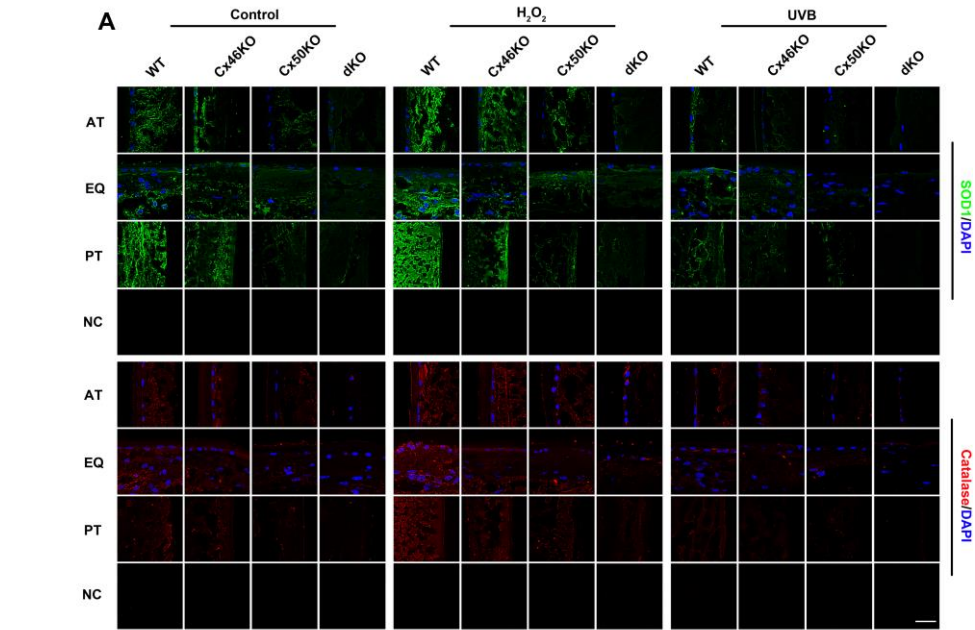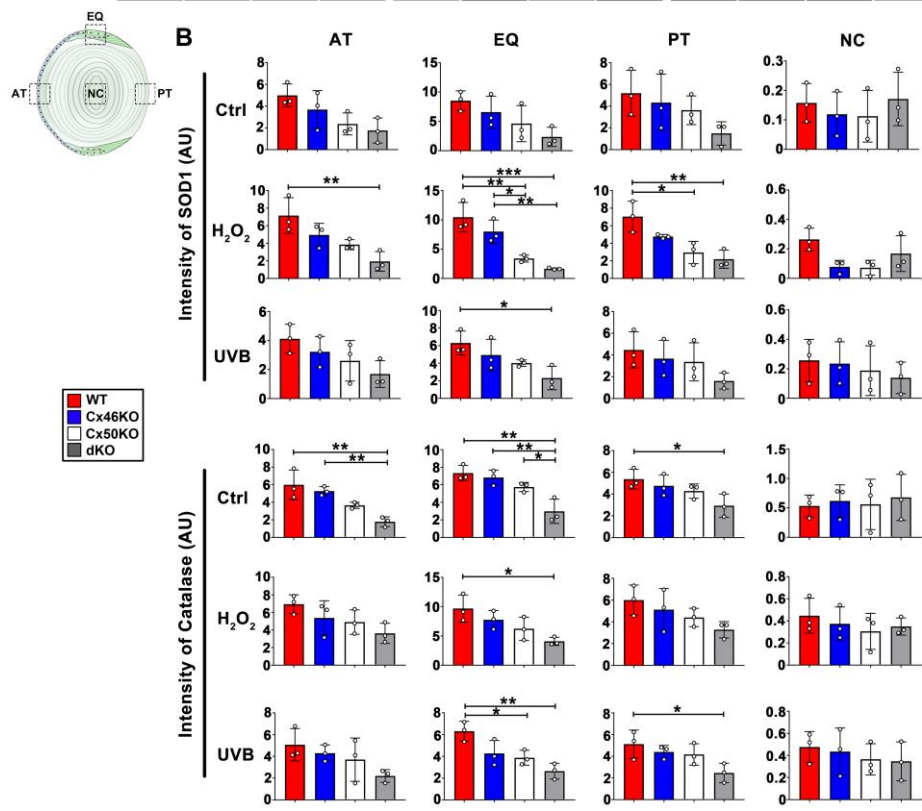



Fig. S5

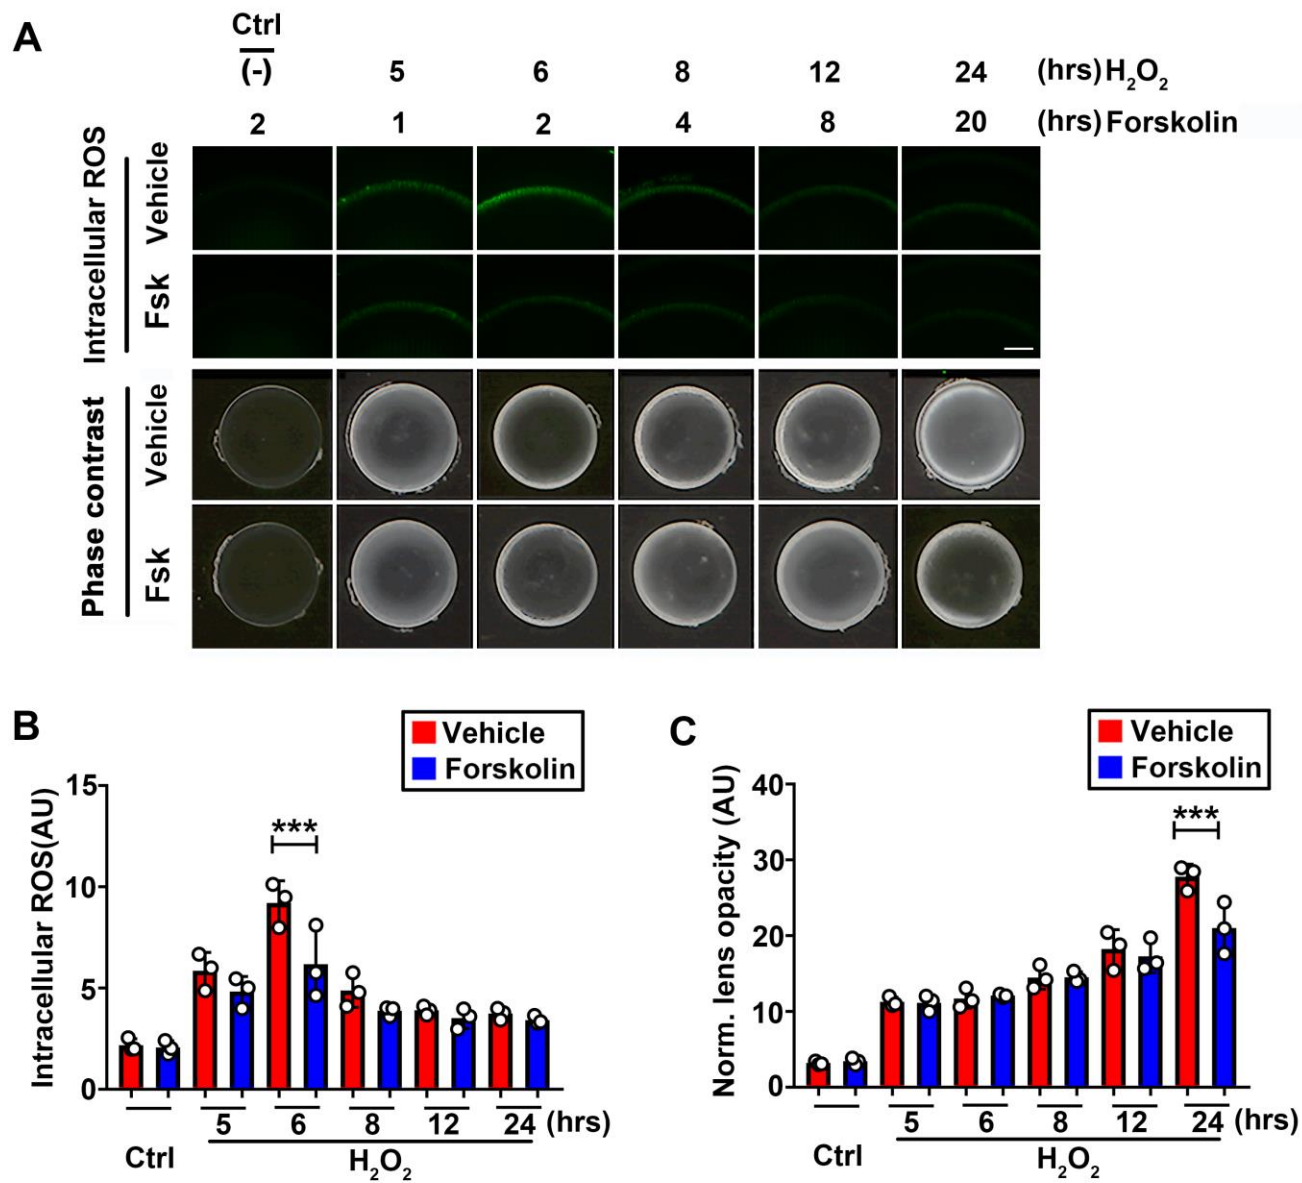

Supplement: mmc1.pdf [file mmc1.pdf]
